# Supplementary material for: Improvement of multiple attenuation characteristics of two-dimensional lamellar ferrocobalt@carbon nanocomposites as excellent electromagnetic wave absorbers
Source: Royal Society of Chemistry journal article supplement (doi:10.1039/d2dt01503j), 2022-01-01
Supplement: d2dt01503j1.pdf [file d2dt01503j1.pdf]

## Supplementary Information

### Improvement of multiple attenuation characteristics of two-dimensional lamellar ferrocobalt@carbon nanocomposites as excellent electromagnetic wave absorber

Junjie Pan <sup>a</sup>, Weijun Tu <sup>b</sup>, Shanhong Ma <sup>c</sup>, Xin Sun <sup>d</sup>, Qiliang Zhao <sup>a</sup>, Hongjiao Qu <sup>a</sup>, Tao Wang <sup>a</sup>, and Jianping He <sup>a\*</sup>

<sup>a</sup> College of Materials Science and Technology, Jiangsu Key Laboratory of Materials and Technology for Energy Conversion, Nanjing University of Aeronautics and Astronautics, 210016 Nanjing, P.R. China.

<sup>b</sup> Military Representative Office of Shanghai Regional Military Representative office of Air Force Equipment Department in Nanchang, High-tech Zone Nanchang, Jiangxi, P.R. China.

<sup>c</sup> Avic Jiangxi Hongdu Aviation Industry Group Corporation Limited, High-tech Zone Nanchang, Jiangxi, P.R. China.

<sup>d</sup> Science and Technology on Electromagnetic Scattering Laboratory, 100854 Beijing, P.R. China.

\*Corresponding author. Tel: +86 25 52112906; Fax: +86 25 52112626. E-mail address: [jianph@nuaa.edu.cn](mailto:jianph@nuaa.edu.cn).

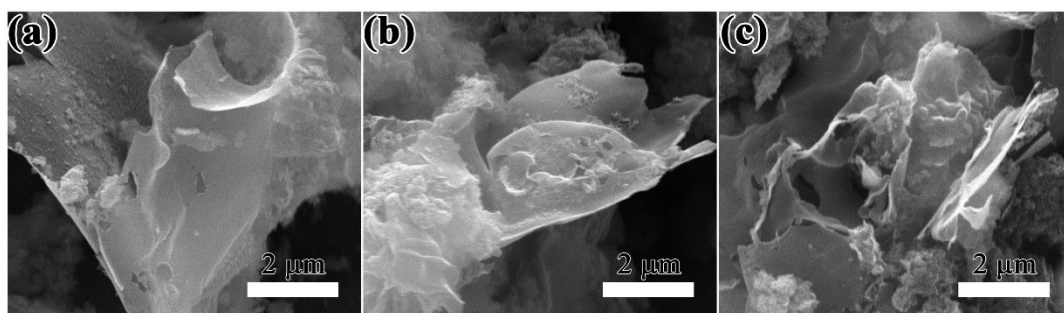

Fig. S1 The SEM images of (a) Co<sub>0.3</sub>Fe<sub>0.7</sub>/C, (b) Co<sub>0.5</sub>Fe<sub>0.5</sub>/C and (c) Co<sub>0.7</sub>Fe<sub>0.3</sub>/C nanocomposites.

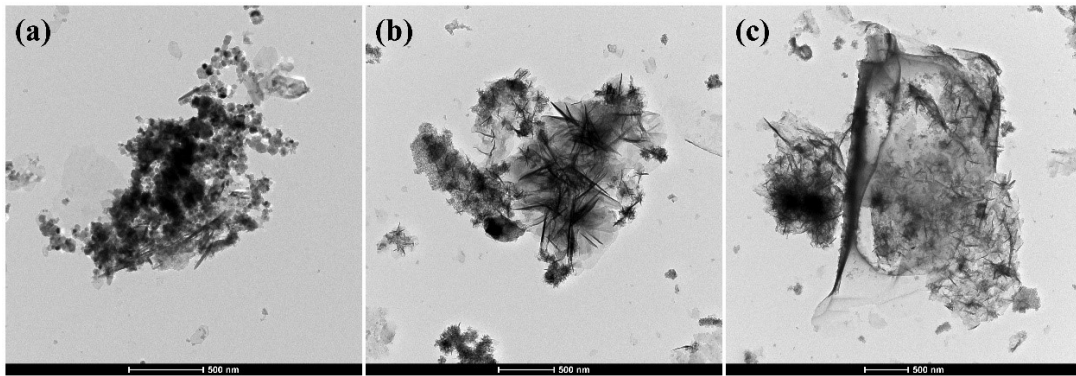

Fig. S2 The TEM images of (a)  $\text{Co}_{0.3}\text{Fe}_{0.7}/\text{C}$ , (b)  $\text{Co}_{0.5}\text{Fe}_{0.5}/\text{C}$  and (c)  $\text{Co}_{0.7}\text{Fe}_{0.3}/\text{C}$  nanocomposites.

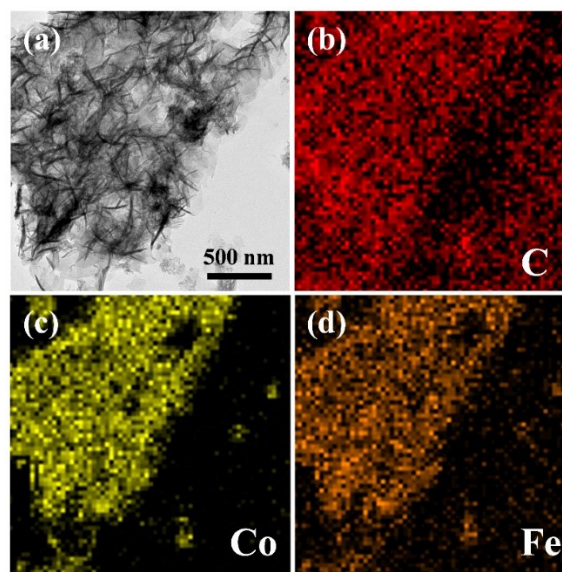

Fig. S3 The (a) TEM and (b-d) elemental mapping images of  $\text{Co}_{0.9}\text{Fe}_{0.1}/\text{C}$  nanocomposites.

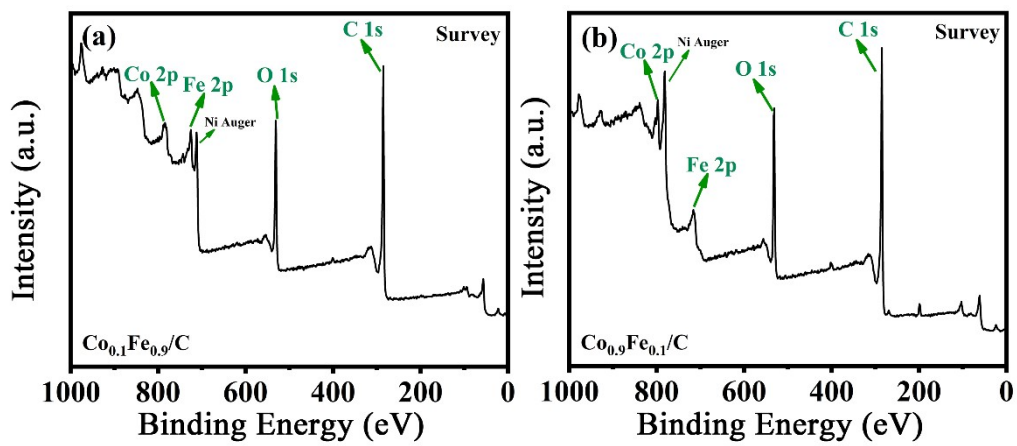

Fig. S4 XPS survey spectra of (a)  $\text{Co}_{0.1}\text{Fe}_{0.9}/\text{C}$  and (b)  $\text{Co}_{0.9}\text{Fe}_{0.1}/\text{C}$ .

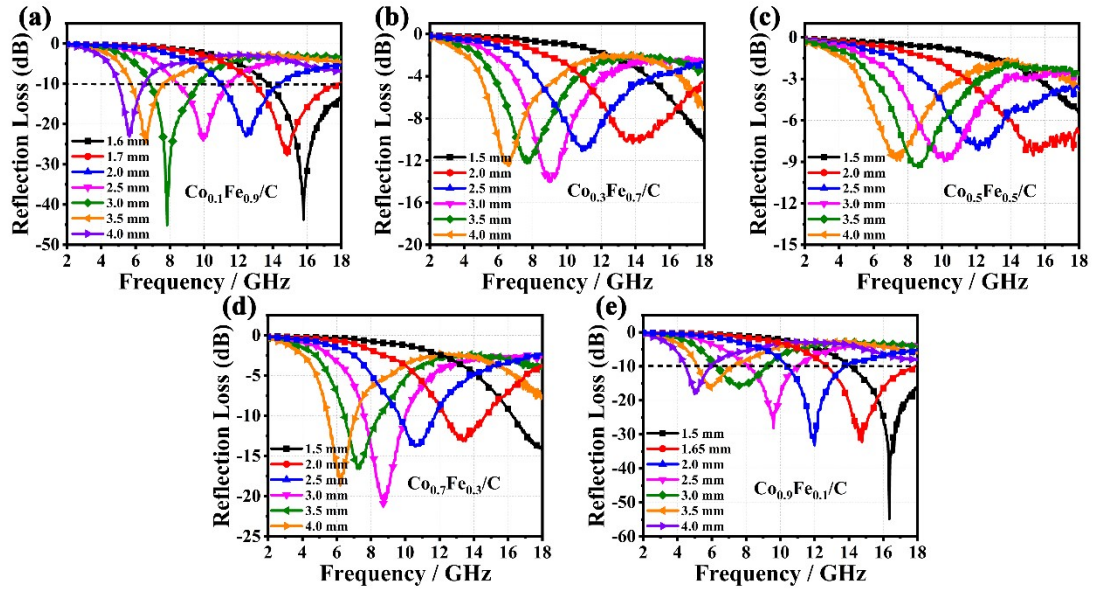

Fig. S5 The simulated reflection loss ( $RL$ ) curves of 2D lamellar (a)  $\text{Co}_{0.1}\text{Fe}_{0.9}/\text{C}$ , (b)  $\text{Co}_{0.3}\text{Fe}_{0.7}/\text{C}$ , (c)  $\text{Co}_{0.5}\text{Fe}_{0.5}/\text{C}$ , (d)  $\text{Co}_{0.7}\text{Fe}_{0.3}/\text{C}$  and (e)  $\text{Co}_{0.9}\text{Fe}_{0.1}/\text{C}$  nanocomposites at different thicknesses in the frequency of 2-18 GHz.

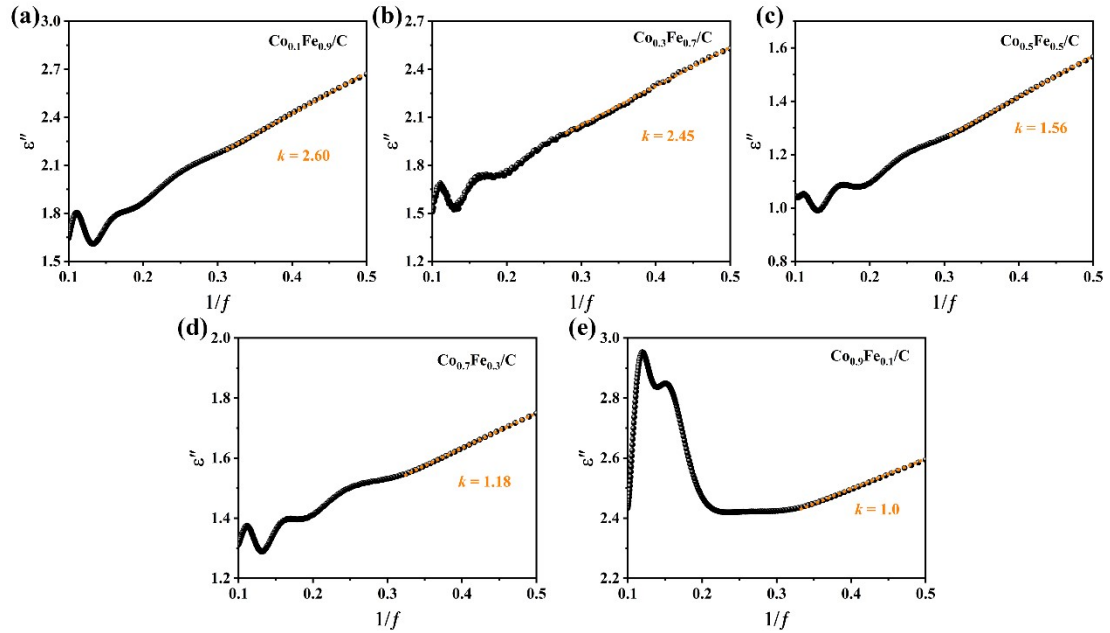

Fig. S6 The  $\varepsilon'' - 1/f$  curves of (a)  $\text{Co}_{0.1}\text{Fe}_{0.9}/\text{C}$ , (b)  $\text{Co}_{0.3}\text{Fe}_{0.7}/\text{C}$ , (c)  $\text{Co}_{0.5}\text{Fe}_{0.5}/\text{C}$ , (d)  $\text{Co}_{0.7}\text{Fe}_{0.3}/\text{C}$ , and (e)  $\text{Co}_{0.9}\text{Fe}_{0.1}/\text{C}$  nanocomposites.

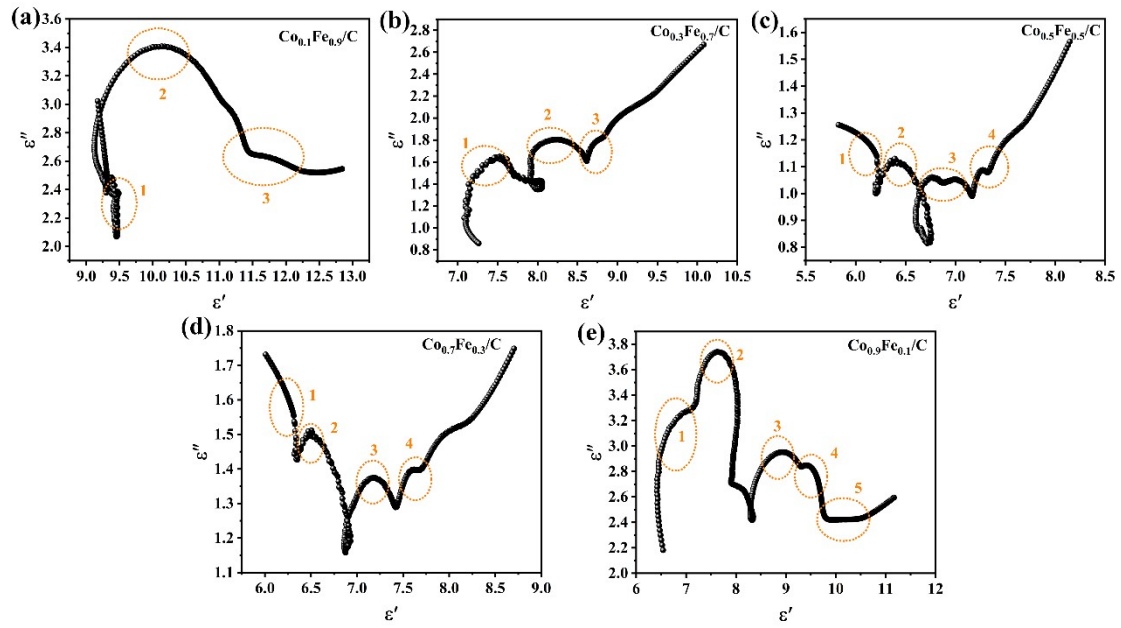

Fig. S7 The  $\epsilon'' - \epsilon'$  curves of (a)  $\text{Co}_{0.1}\text{Fe}_{0.9}/\text{C}$ , (b)  $\text{Co}_{0.3}\text{Fe}_{0.7}/\text{C}$ , (c)  $\text{Co}_{0.5}\text{Fe}_{0.5}/\text{C}$ , (d)  $\text{Co}_{0.7}\text{Fe}_{0.3}/\text{C}$ , and (e)  $\text{Co}_{0.9}\text{Fe}_{0.1}/\text{C}$  nanocomposites.

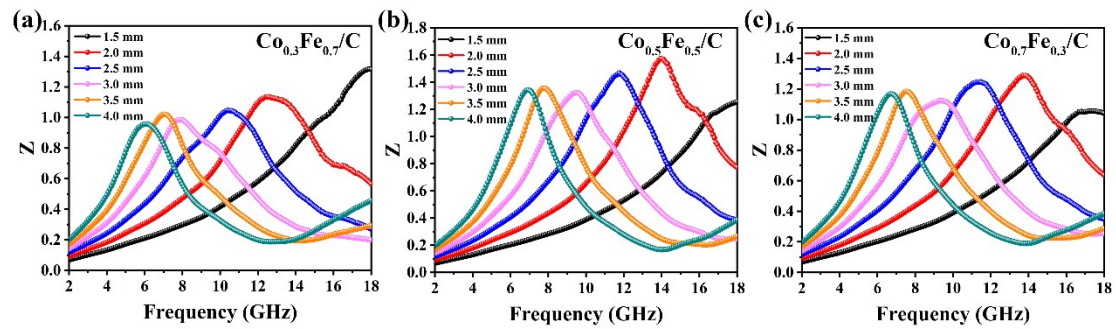

Fig. S8 The impedance matching factor ( $Z$ ) of (a)  $\text{Co}_{0.3}\text{Fe}_{0.7}/\text{C}$ , (b)  $\text{Co}_{0.5}\text{Fe}_{0.5}/\text{C}$  and (c)  $\text{Co}_{0.7}\text{Fe}_{0.3}/\text{C}$  nanocomposites.
